# Supplementary material for: Source–Sink Manipulation Affects Accumulation of Zinc and Other Nutrient Elements in Wheat Grains
Source: MDPI journal article supplement (doi:10.3390/plants10051032), 2021-05-20
Supplement: s1 [file s1]

## SUPPLEMENTARY MATERIALS

**Table S1.** Effects of soil Zn application and source-sink manipulations on single panicle weights and kernel numbers per spike of different wheat cultivars.

| Zn application rate<br>(ZnSO <sub>4</sub> ·7H <sub>2</sub> O kg·ha <sup>-1</sup> ) | Treatments             | Single panicle weight (g) |          | Kernel number per spike |          |
|------------------------------------------------------------------------------------|------------------------|---------------------------|----------|-------------------------|----------|
|                                                                                    |                        | Jimai 22                  | Jimai 44 | Jimai 22                | Jimai 44 |
| 0                                                                                  | Control                | 2.5A                      | 2.0A     | 42.2A                   | 34.5AB   |
|                                                                                    | Flag leaf removal      | 1.7B                      | 1.7B     | 36.0Ba                  | 31.3BCb  |
|                                                                                    | Half spikelets removal | 1.3D                      | 1.2C     | 19.9D                   | 17.2E    |
|                                                                                    | Spike shading          | 1.6BC                     | 1.3C     | 31.7C                   | 30.2C    |
| 30                                                                                 | Control                | 2.4A                      | 2.1A     | 41.9A                   | 35.7A    |
|                                                                                    | Flag leaf removal      | 1.7B                      | 1.6B     | 35.9B                   | 33.6ABC  |
|                                                                                    | Half spikelets removal | 1.4Ca                     | 1.3Cb    | 21.8D                   | 18.6E    |
|                                                                                    | Spike shading          | 1.4C                      | 1.2C     | 29.9C                   | 25.2D    |

Values followed by different capital letters in the same column are significantly different among treatments at  $p \leq 0.05$ . Values followed by different lowercase letters in the same row are significantly different among treatments at  $p \leq 0.05$ .

**Table S2.** Effects of soil Zn application and source-sink manipulations on concentrations of Zn, Cu, Ca and K in grains of different wheat cultivars.

| Zn application rate<br>(ZnSO <sub>4</sub> ·7H <sub>2</sub> O kg·ha <sup>-1</sup> ) | Treatments             | Zn (mg·kg <sup>-1</sup> ) |          | Cu (mg·kg <sup>-1</sup> ) |          | Ca (mg·kg <sup>-1</sup> ) |          | K (g·kg <sup>-1</sup> ) |          |
|------------------------------------------------------------------------------------|------------------------|---------------------------|----------|---------------------------|----------|---------------------------|----------|-------------------------|----------|
|                                                                                    |                        | Jimai 22                  | Jimai 44 | Jimai 22                  | Jimai 44 | Jimai 22                  | Jimai 44 | Jimai 22                | Jimai 44 |
| 0                                                                                  | Control                | 29.2D                     | 42.2BC   | 4.4B                      | 5.4CD    | 497.4ABC                  | 484.5AB  | 3.8BC                   | 3.2CD    |
|                                                                                    | Flag leaf removal      | 35.0C                     | 34.3D    | 4.6Bb                     | 5.7CDa   | 473.5C                    | 481.1AB  | 4.0B                    | 3.4C     |
|                                                                                    | Half spikelets removal | 55.6Aa                    | 47.4ABb  | 5.9Ab                     | 6.2Ba    | 487.4BC                   | 453.9BC  | 3.1C                    | 2.9D     |
|                                                                                    | Spike shading          | 42.4B                     | 42.4BC   | 5.8A                      | 6.9A     | 416.8D                    | 376.3D   | 5.7A                    | 4.6B     |
| 30                                                                                 | Control                | 32.4CD                    | 39.5CD   | 4.3B                      | 5.3DE    | 518.6AB                   | 480.3AB  | 3.9BC                   | 3.4C     |
|                                                                                    | Flag leaf removal      | 33.3Cb                    | 40.8BCDa | 4.7B                      | 4.9E     | 513.4AB                   | 498.8A   | 3.8BC                   | 4.2B     |
|                                                                                    | Half spikelets removal | 56.4A                     | 53.4A    | 5.6Ab                     | 5.8BCa   | 528.8Aa                   | 439.8Cb  | 3.4BC                   | 3.4C     |
|                                                                                    | Spike shading          | 40.2B                     | 49.5A    | 5.6A                      | 5.8BC    | 361.6E                    | 349.1D   | 6.5A                    | 5.4A     |

Values followed by different capital letters in the same column are significantly different among treatments at  $p \leq 0.05$ . Values followed by different lowercase letters in the same row are significantly different among treatments at  $p \leq 0.05$ .

**Table S3.** Effects of soil Zn application and source-sink manipulations on yields of Zn, Fe, Mn, Cu, N, P, K, Ca, Mg and phytate-P in grains of 28 wheat spikes sampled in each plot.

| Treatments                                      | Zn (mg) | Fe (mg) | Mn (mg) | Cu (mg) | N (mg)  | P (mg)  | K (mg)  | Ca (mg) | Mg (mg) | Phytate-P (mg) |
|-------------------------------------------------|---------|---------|---------|---------|---------|---------|---------|---------|---------|----------------|
| <b>Zn application rate (kg·ha<sup>-1</sup>)</b> |         |         |         |         |         |         |         |         |         |                |
| ZnSO <sub>4</sub> ·7H <sub>2</sub> O (0)        | 1.5     | 1.9     | 1.7     | 0.21    | 644.4b  | 123.4   | 147.1b  | 17.7    | 57.6    | 116.4          |
| ZnSO <sub>4</sub> ·7H <sub>2</sub> O (30)       | 1.6     | 1.6     | 1.8     | 0.20    | 724.3a  | 120.0   | 161.0a  | 18.2    | 59.8    | 119.3          |
| LSD <sub>0.05</sub>                             | 0.1     | 0.4     | 0.1     | 0.02    | 44.7    | 13.9    | 11.5    | 1.3     | 4.4     | 9.0            |
| <b>Cultivar (C)</b>                             |         |         |         |         |         |         |         |         |         |                |
| Jimai 22                                        | 1.6     | 1.8     | 1.8     | 0.20    | 708.7a  | 125.8   | 170.6a  | 19.5a   | 61.8a   | 125.5a         |
| Jimai 44                                        | 1.6     | 1.7     | 1.7     | 0.21    | 660.1b  | 117.6   | 137.5b  | 16.4b   | 55.6b   | 110.2b         |
| LSD <sub>0.05</sub>                             | 0.1     | 0.4     | 0.1     | 0.02    | 44.7    | 13.9    | 11.5    | 1.3     | 4.4     | 9.0            |
| <b>Source-sink treatment (SS)</b>               |         |         |         |         |         |         |         |         |         |                |
| Control                                         | 1.8a    | 2.2a    | 2.4a    | 0.25a   | 882.5a  | 135.8a  | 187.5a  | 25.9a   | 74.9a   | 143.5a         |
| Flag leaf removal                               | 1.4b    | 1.8ab   | 1.6b    | 0.20b   | 642.4b  | 111.9b  | 153.1b  | 19.5b   | 60.4b   | 115.6b         |
| Half spikelets removal                          | 1.6b    | 1.5b    | 1.7b    | 0.17c   | 584.4b  | 115.0b  | 93.4c   | 13.9c   | 52.9c   | 104.1b         |
| Spike shading                                   | 1.4b    | 1.5b    | 1.3c    | 0.20b   | 628.1b  | 124.3ab | 182.1a  | 12.4c   | 46.6d   | 108.2b         |
| LSD <sub>0.05</sub>                             | 0.2     | 0.6     | 0.2     | 0.02    | 63.2    | 19.6    | 18.3    | 1.9     | 6.2     | 12.8           |
| <b>ANOVA</b>                                    |         |         |         |         |         |         |         |         |         |                |
| Zn                                              | 0.2347  | 0.1907  | 0.6355  | 0.1680  | 0.0010  | 0.6175  | 0.0198  | 0.4889  | 0.3213  | 0.5164         |
| C                                               | 0.7439  | 0.6408  | 0.0753  | 0.6930  | 0.0342  | 0.2355  | <0.0001 | <0.0001 | 0.0067  | 0.0017         |
| SS                                              | 0.0003  | 0.1216  | <0.0001 | <0.0001 | <0.0001 | 0.0782  | <0.0001 | <0.0001 | <0.0001 | <0.0001        |
| Zn × C                                          | 0.3535  | 0.3391  | 0.9158  | 0.4711  | 0.6835  | 0.0534  | 0.2493  | 0.9567  | 0.4253  | 0.6445         |
| Zn × SS                                         | 0.1772  | 0.8502  | 0.0873  | 0.0645  | 0.0628  | 0.6066  | 0.4695  | 0.0209  | 0.0696  | 0.2355         |
| C × SS                                          | 0.0056  | 0.6374  | 0.0257  | 0.1608  | 0.2828  | 0.0641  | 0.0144  | 0.0330  | 0.1193  | 0.1637         |
| Zn × C × SS                                     | 0.5445  | 0.4791  | 0.2593  | 0.2293  | 0.2742  | 0.6632  | 0.1987  | 0.8720  | 0.5871  | 0.0594         |

Values followed by different lowercase letters in the same column are significantly different among treatments at  $p \leq 0.05$ . Values under ANOVA are probabilities ( $p$  values) of the source of variation.

**Table S4.** Effects of soil Zn application and source-sink manipulations on yields of ABA and ACC in grains of 28 wheat spikes sampled in each plot.

| Treatments                                      | ABA (ng) | ACC (ng) |
|-------------------------------------------------|----------|----------|
| <b>Zn application rate (kg·ha<sup>-1</sup>)</b> |          |          |
| ZnSO <sub>4</sub> ·7H <sub>2</sub> O (0)        | 961.6    | 1529.6a  |
| ZnSO <sub>4</sub> ·7H <sub>2</sub> O (30)       | 1182.3   | 1322.2b  |
| LSD <sub>0.05</sub>                             | 254.2    | 185.7    |
| <b>Cultivar (C)</b>                             |          |          |
| Jimai 22                                        | 1256.8a  | 1290.6b  |
| Jimai 44                                        | 887.2b   | 1561.2a  |
| LSD <sub>0.05</sub>                             | 254.2    | 185.7    |
| <b>Source-sink treatment (T)</b>                |          |          |
| Control                                         | 1485.8a  | 1741.7a  |
| Flag leaf removal                               | 1031.2b  | 1355.3b  |
| Half spikelets removal                          | 1260.1ab | 875.5c   |
| Spike shading                                   | 510.8c   | 1731.0a  |
| LSD <sub>0.05</sub>                             | 359.5    | 262.7    |
| <b>ANOVA</b>                                    |          |          |
| Zn                                              | 0.0863   | 0.0299   |
| C                                               | 0.0058   | 0.0057   |
| SS                                              | <0.0001  | <0.0001  |
| Zn × C                                          | 0.2961   | 0.0139   |
| Zn × SS                                         | 0.2433   | 0.5183   |
| C × SS                                          | 0.0233   | 0.3574   |
| Zn × C × SS                                     | 0.6095   | 0.1047   |

Values followed by different lowercase letters in the same column are significantly different among treatments at  $p \leq 0.05$ . Values under ANOVA are probabilities ( $p$  values) of the source of variation.

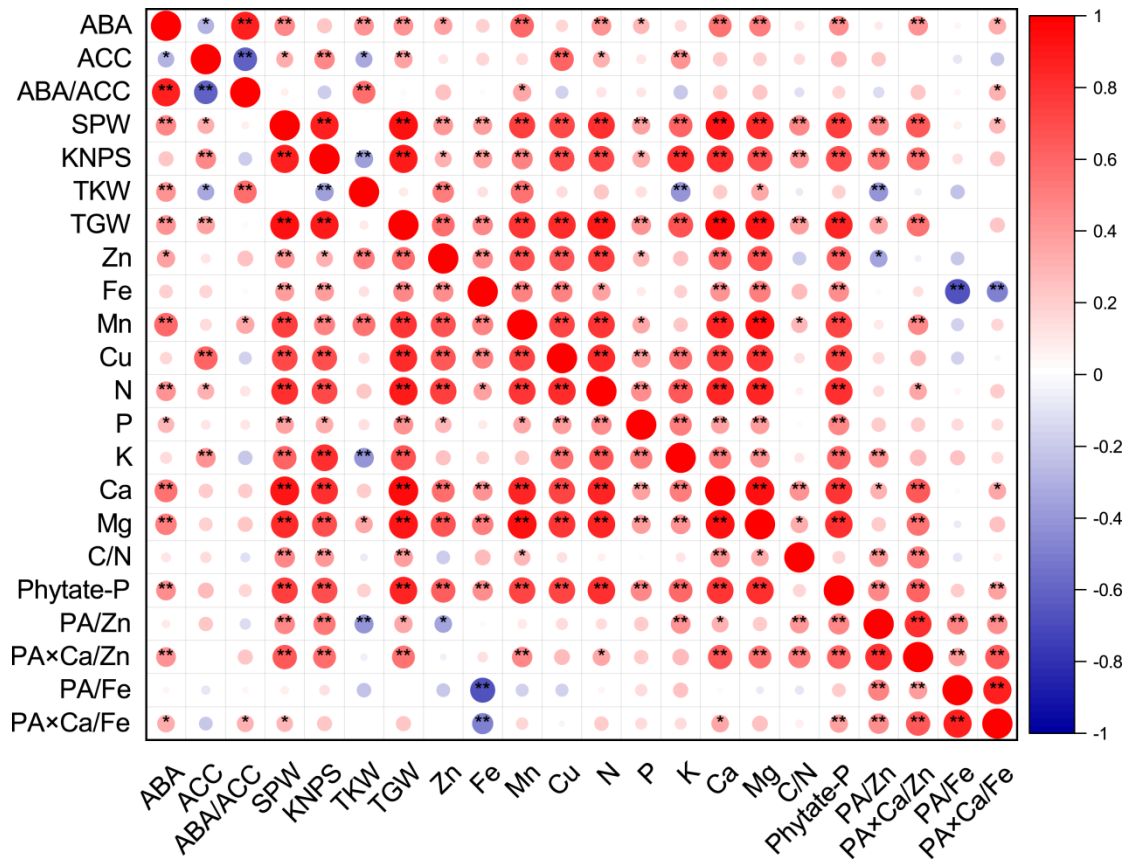

**Figure S1.** Corrplot representing correlation among measured grain phytohormones (yields of ABA and ACC, and ratios of ABA/ACC), grain yield traits and nutritional parameters (yields and ratios) of wheat crop across different soil Zn applications, cultivars and source-sink treatments ( $n = 48$ ). Positive correlations are displayed in red and negative correlations in blue color. The color legend on the right-hand side of corrplot, shows correlation coefficients and the corresponding colors. The intensity of the color and circle size is proportional to the correlation coefficients. “\*\*” and “\*\*\*” indicate significant correlations at  $p \leq 0.05$  and  $p \leq 0.01$ , respectively. The abbreviations are as follows: single panicle weight (SPW), kernel number per spike (KNPS), thousand kernel weight (TKW), total grain weight (TGW), yields/accumulation of abscisic acid (ABA), the ethylene precursor 1-aminocyclopropane-1-carboxylic acid (ACC), Zn, Fe, Mn, Cu, N, P, K, Ca, Mg and phytate-P, ratios of C/N and ABA/ACC, and molar ratios of phytic acid (PA)/Zn, PA  $\times$  Ca/Zn, PA/Fe and PA  $\times$  Ca/Fe in wheat grains.
